# Supplementary material for: Conjugated donor–acceptor star molecules: a new concept for substantial dielectric breakdown strength improvement in PVDF films
Source: Royal Society of Chemistry journal article supplement (doi:10.1039/d0tc02132f), 2020-01-01
Supplement: d0tc02132f1.pdf [file d0tc02132f1.pdf]

**Conjugated Donor-Acceptor Star Molecules: New Concept for Substantial Dielectric  
Breakdown Strength Improvement in PVDF Film**

Yong Lu,<sup>a</sup> Hui Chen,<sup>a</sup> Song Kiat Jacob Lim<sup>1,ab</sup>, Xuehan He,<sup>b</sup> Mingfeng Wang,<sup>c</sup> Xiao Hu,<sup>\*abd</sup>

<sup>a</sup> Temasek Laboratories@NTU, Nanyang Technological University, Research Techno Plaza,  
50 Nanyang Drive, 637553, Singapore.

<sup>b</sup> School of Materials Science and Engineering, Nanyang Technological University, 639798,  
Singapore.

<sup>c</sup> School of Chemical and Biomedical Engineering, Nanyang Technological University  
Singapore, 637459 Singapore.

<sup>d</sup> Nanyang Environment and Water Research Institute, Nanyang Technological University,  
Singapore 637141, Singapore.

\*Corresponding author:

Email address: ASXHU@ntu.edu.sg

**Table 1S.** Functional Additives Based on C<sub>60</sub>, Anthracene and Their Derivatives as well as Some Other Small Molecules for BDS Improvement of Polymer Systems.

| Additives                            | Polymers | Adding content | Enhancement | Testing conditions | Ref       |
|--------------------------------------|----------|----------------|-------------|--------------------|-----------|
| C60                                  | XLPE     | 0.1 wt%        | 15%         | AC                 | [15]      |
|                                      | PP       | 0.1 wt%        | 21%         | DC                 | [16]      |
|                                      | Epoxy    | 0.6 wt%        | 30%         | AC                 | [17]      |
| PC <sub>60</sub> BM                  | XLPE     | 0.1 (0.05) wt% | 26 (32)%    | AC                 | [15]      |
| Anthracene                           | LDPE     | 0.1 wt%        | 50%         | DC                 | [18]      |
| Anthracene modified SiO <sub>2</sub> | PP       | 2 wt%          | 15%         | DC and AC          | [19]      |
| Azo compounds                        | LDPE     | 0.1 wt%        | 50%         | DC                 | [20]      |
| Benzophenone derivatives             | XLPE     | 1 wt%          | 13.5%       | AC                 | [21]      |
| Thioxanthone derivatives             | XLPE     | ~ 0.3 wt%      | 55%         | AC                 | [22]      |
| Acridine derivatives                 | XLPE     | ~ 0.76 wt%     | 18.4%       | AC                 | [23]      |
| Benzil derivatives                   | XLPE     | ~ 1 wt%        | 62%         | AC                 | [24]      |
| D-A star-shaped molecules            | PVDF-t   | 0.1 wt%        | 27%         | DC                 | This work |

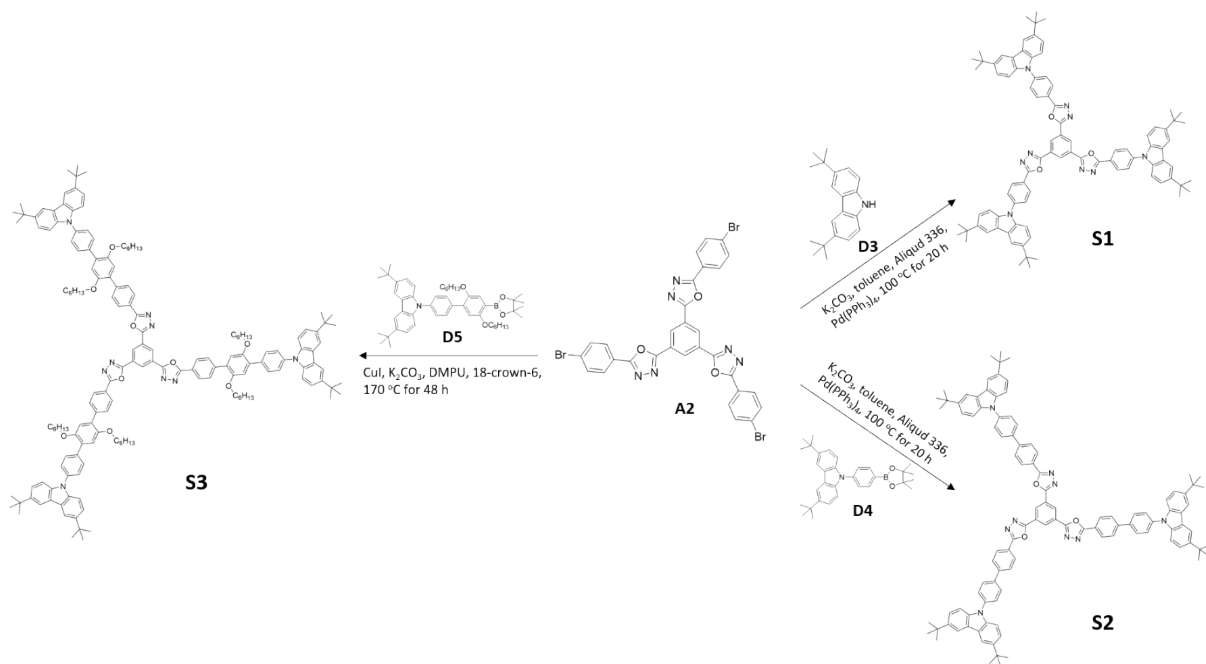

**Figure S1.** Schematic of preparation and molecular structures of S1, S2 and S3.

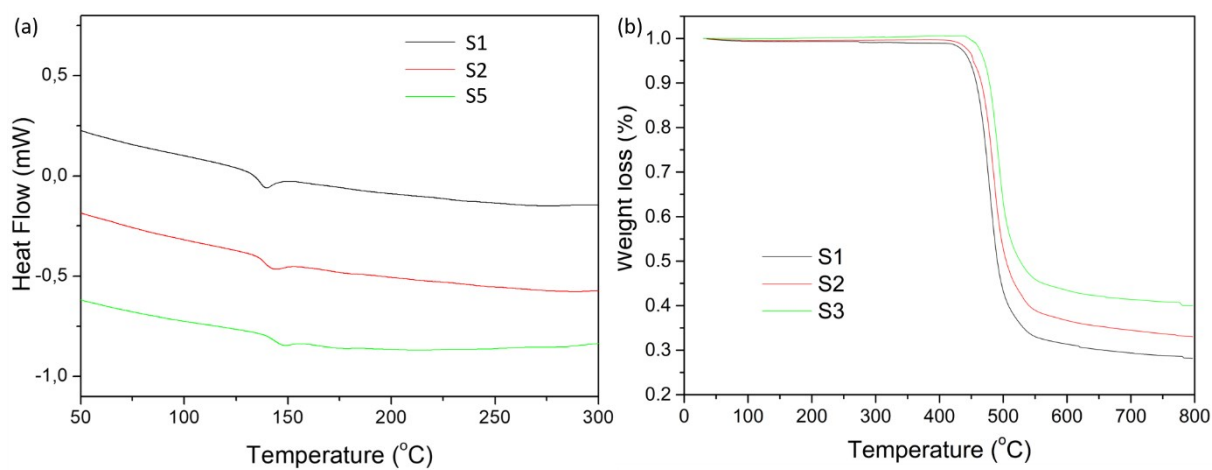

**Figure S2.** (a) DSC and (b) TGA curves of S1, S2 and S3 under N<sub>2</sub> atmosphere.

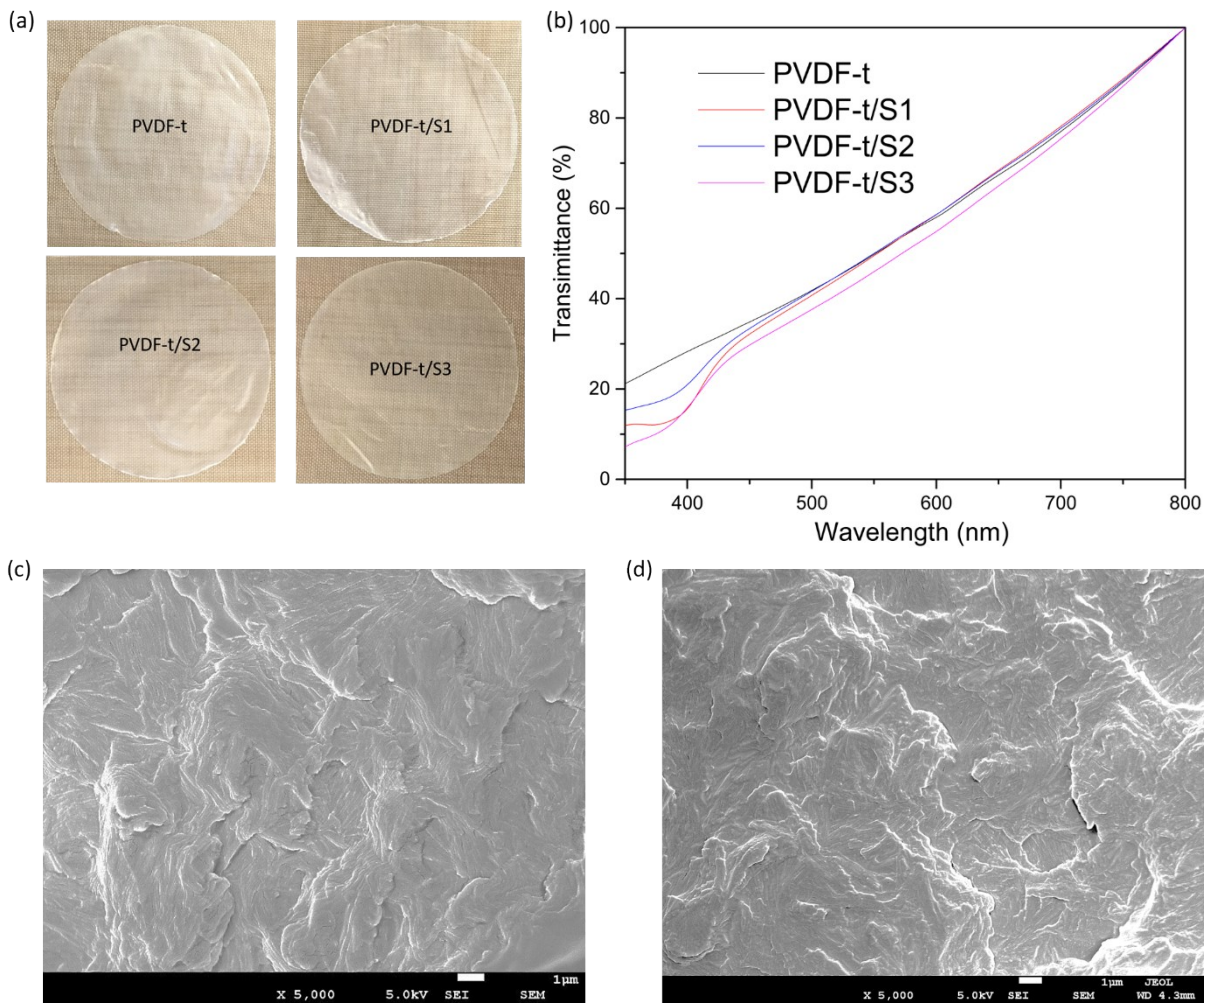

**Figure S3.** (a) Optical images and (b) transmittance spectra of neat PVDF-t and PVDF-t/S1-S3 films. SEM images of cross section of polymer films of (c) neat PVDF-t and (d) PVDF-t/S3(0.1 wt%).

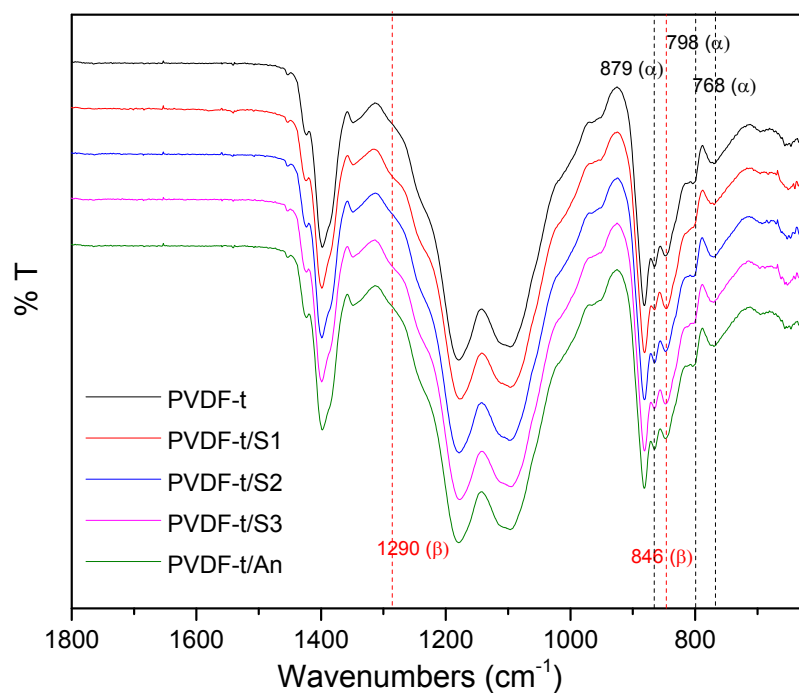

**Figure S4.** FT-IR spectra of PVDF-t with the additives of small molecules in 0.1 wt%.

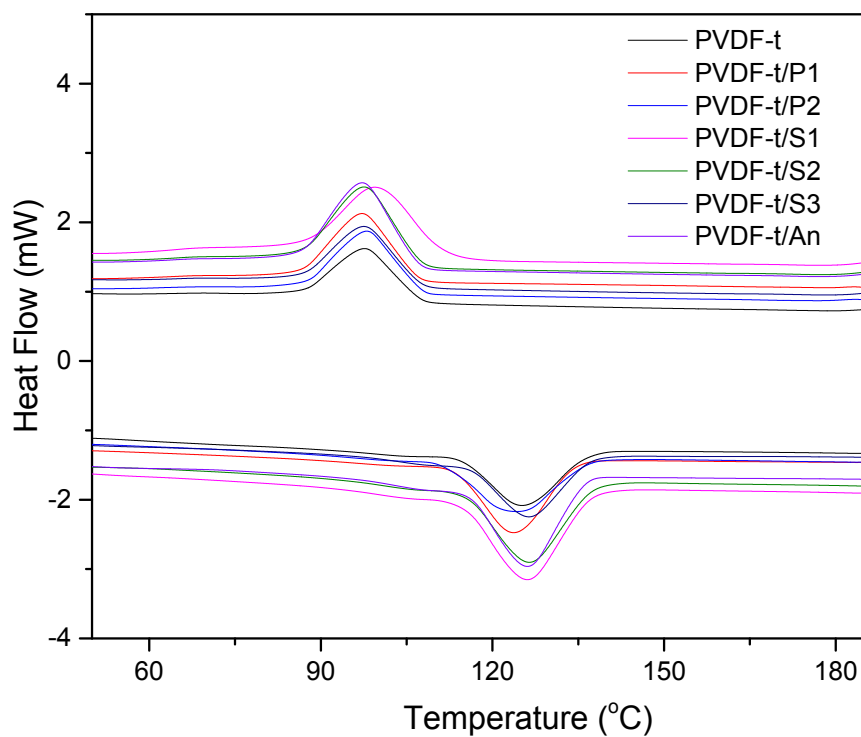

**Figure S5.** DSC curves of PVDF-t polymer films with the additives in 0.1 wt%.

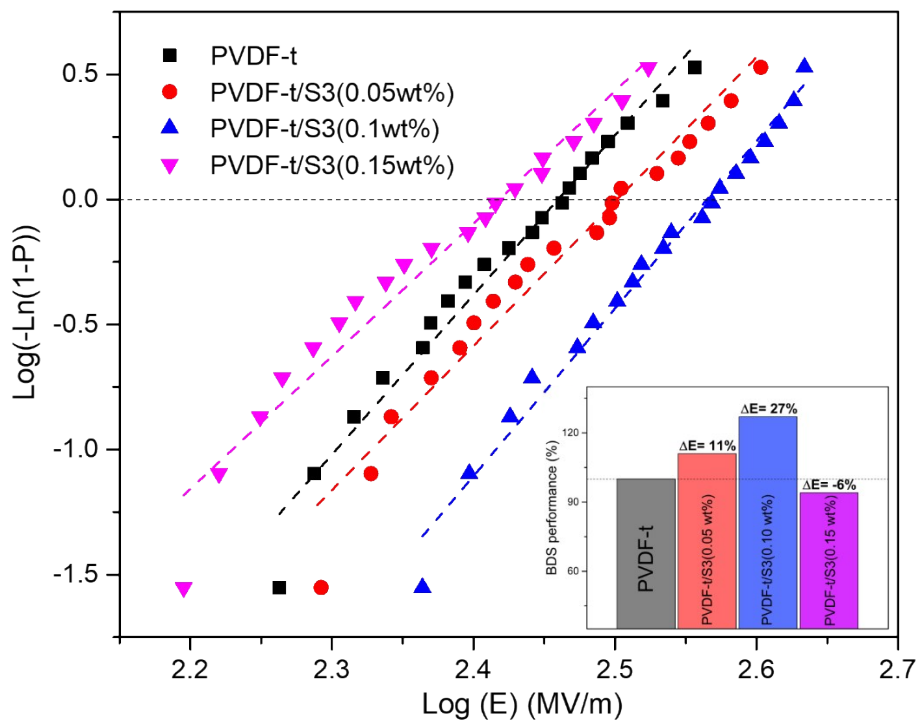

**Figure S6.** Weibull distribution of BDS of neat PVDF-t film and PVDF-t film containing S3 in 0.05, 0.1 and 0.15 wt%. inset: BDS performance of PVDF-t film with the S3 additives.
